# Supplementary material for: A unified ligand electronic parameter based on 13C NMR spectroscopy of N-heterocyclic carbene complexes
Source: Royal Society of Chemistry journal article supplement (doi:10.1039/c6dt04222h), 2016-11-24
Supplement: c6dt04222h1.pdf [file c6dt04222h1.pdf]

## Electronic Supplementary Information

### **A unified ligand electronic parameter based on $^{13}\text{C}$ NMR spectroscopy of N-Heterocyclic carbene complexes**

Qiaoqiao Teng and Han Vinh Huynh\*

*Department of Chemistry, National University of Singapore, 3 Science Drive 3,  
117543 Singapore, Singapore. E-mail: [chmhhv@nus.edu.sg](mailto:chmhhv@nus.edu.sg); Fax: +65 6779 1691;  
Tel: +65 6516 2670*



**Molecular structures of complex probes ranked in order of increasing donor strengths of the co-ligand.**

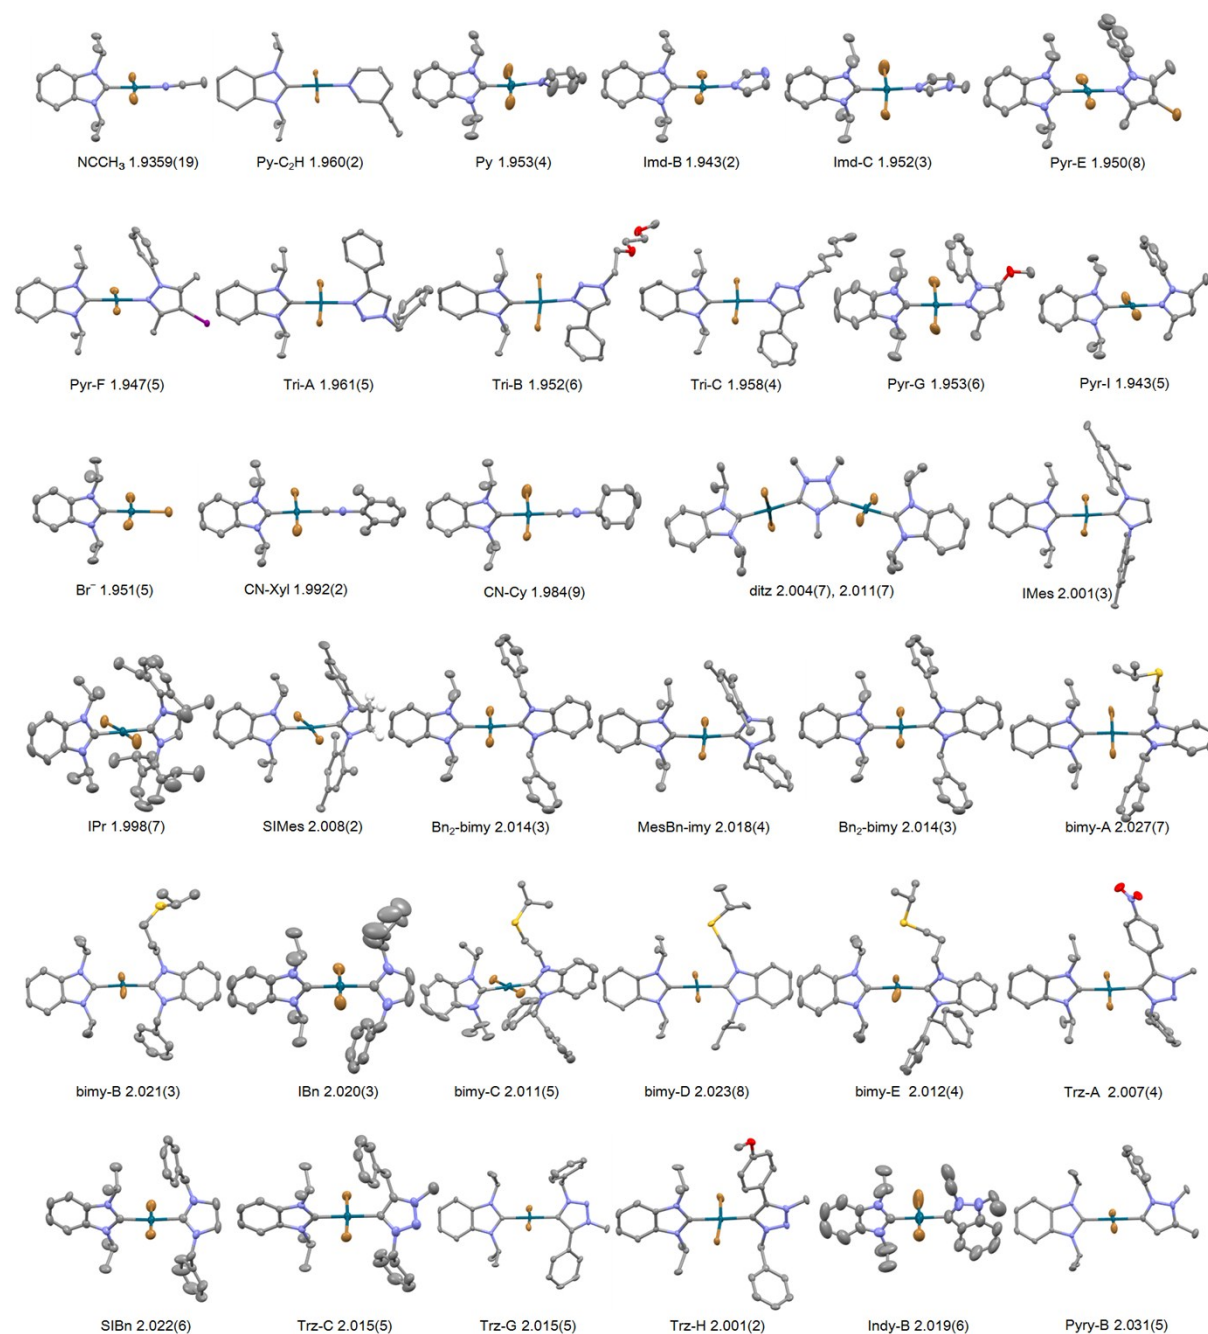

**Figure S1.** Molecular structures of *trans*-[PdBr<sub>2</sub>(iPr<sub>2</sub>-bimy)(NHC)] complexes and *trans*-[PdBr<sub>2</sub>(iPr<sub>2</sub>-bimy)<sub>2</sub>(μ-ditz)].

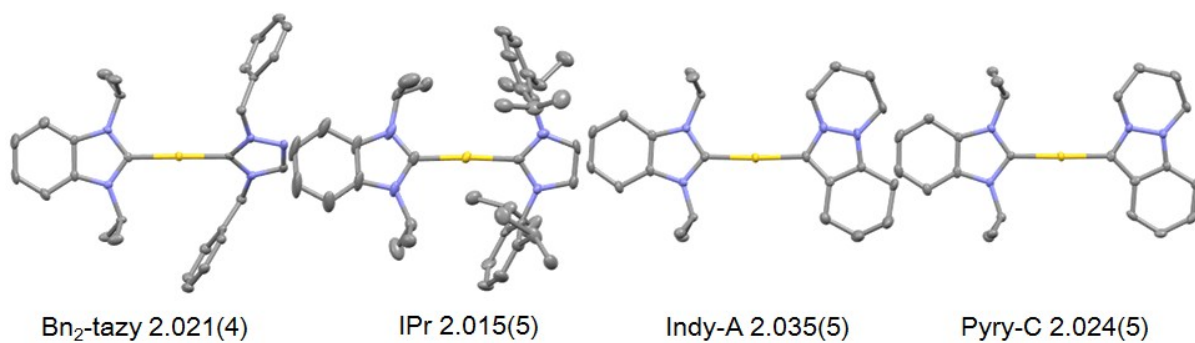

**Figure S2.** Molecular structures of  $[\text{Au}(\text{iPr}_2\text{-bimy})(\text{NHC})]\text{BF}_4$  complexes.

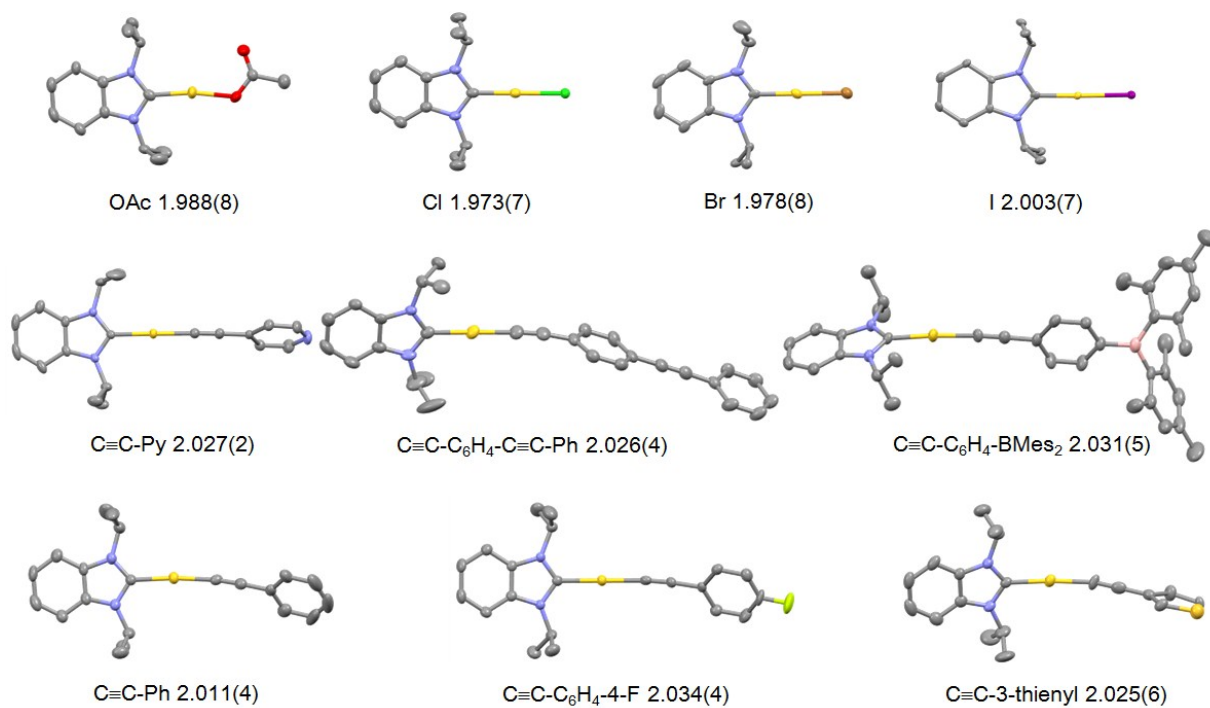

**Figure S3.** Molecular structures of  $[\text{AuX}(\text{iPr}_2\text{-bimy})]$  complexes.

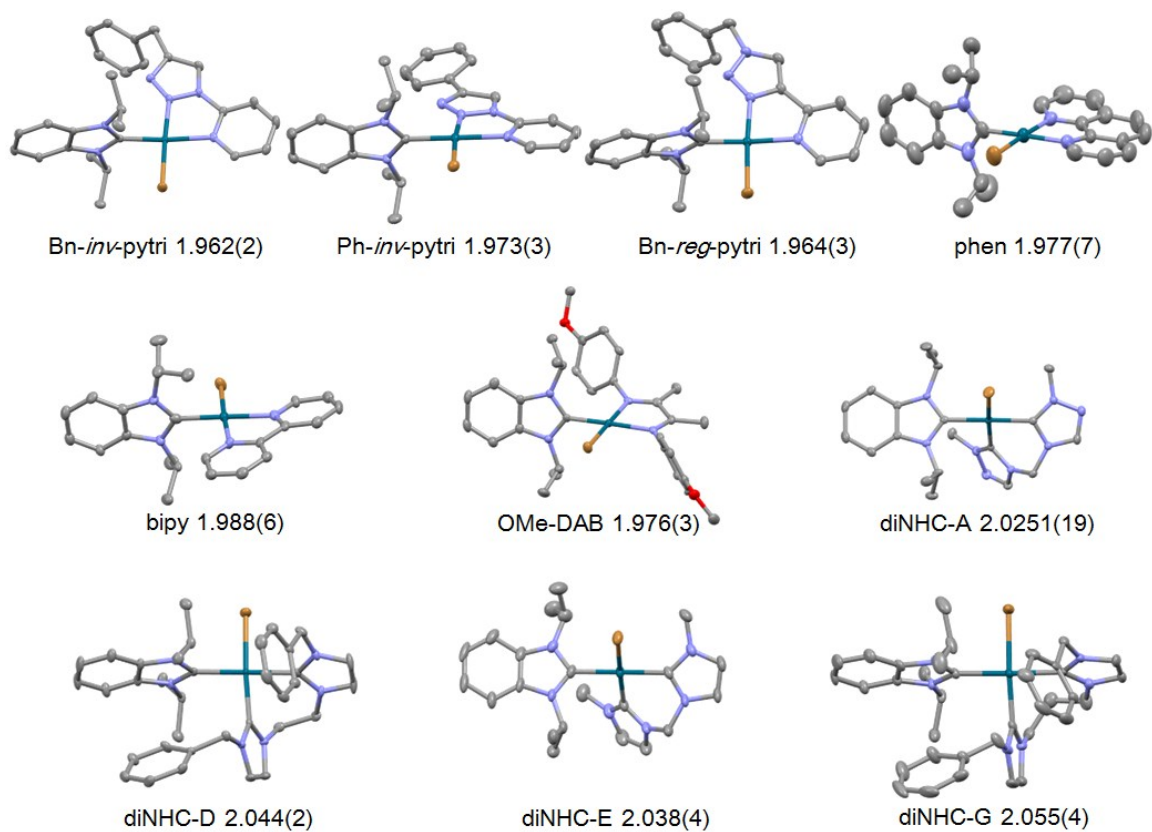

**Figure S4.** Molecular structures of  $[\text{PdBr}(\text{Pr}_2\text{-bimy})(\text{L}_2)]\text{PF}_6$ .
